# Supplementary material for: Exploring the Application of a Debris Flow Likelihood Regression Model in Mediterranean Post-Fire Environments, Using Field Observations-Based Validation
Source: MDPI journal article supplement (doi:10.3390/land12030555), 2023-02-24
Supplement: s1 [file s1]

Archive with 1 entries (1 files):
- land-2201502-supplementary.pdf
