# Supplementary material for: Exploring the Application of a Debris Flow Likelihood Regression Model in Mediterranean Post-Fire Environments, Using Field Observations-Based Validation
Source: MDPI journal article supplement (doi:10.3390/land12030555), 2023-02-24
Supplement: s1 [file s1 › land-2201502-supplementary.pdf]

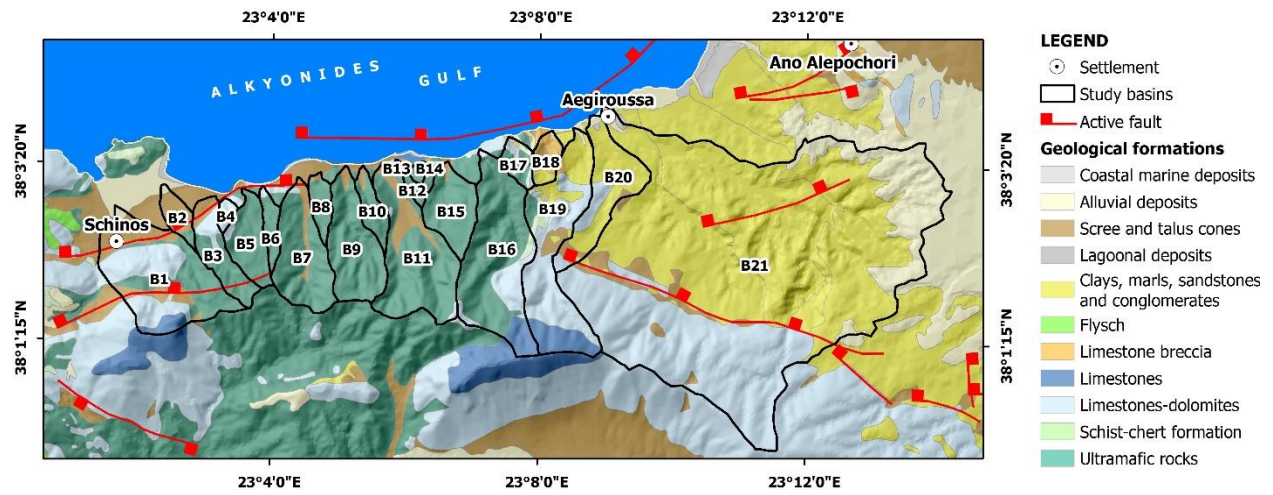

Figure S1. Geological map of the study area, illustrating alpine and post-alpine formations and the active faults.

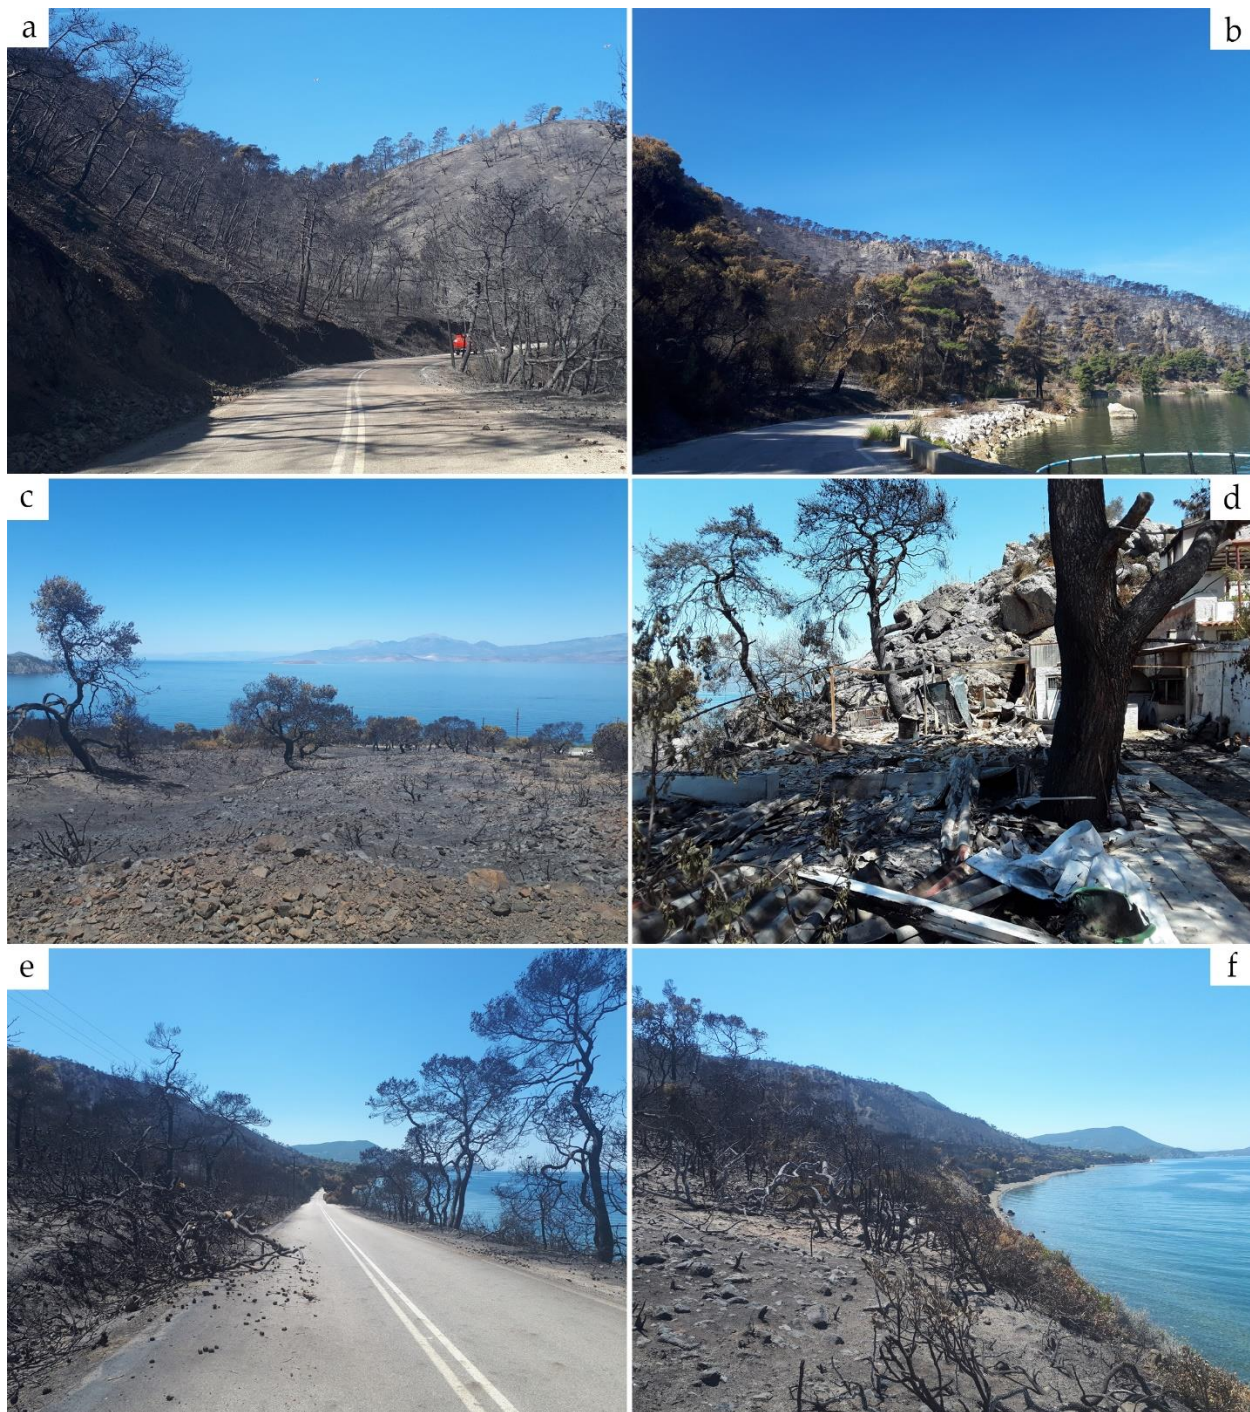

Figure S2. Characteristic viewpoints of the burnt area near the coast, showing (a,b) high inclination slopes typical of the study area, (c,d) views from uphill with slopes covered by loose material – rocks and soil, (e) the main road axis crossing the burnt area, and (f) the boundary of the fire along the burnt slope neighboring the beach. At the hill at the far end of the picture is Schinos village (f).
